# Supplementary material for: Fluorine-expedited nitridation of layered perovskite Sr2TiO4 for visible-light-driven photocatalytic overall water splitting
Source: PubMed Central journal article supplement — Nat Commun. 2025 Jan 3;16:361. doi: 10.1038/s41467-024-55748-z (PMC11699056; doi:10.1038/s41467-024-55748-z), 2025-01-03
Supplement: 41467_2024_55748_MOESM1_ESM.pdf [file 41467_2024_55748_MOESM1_ESM.pdf]

## Supplementary Materials

### **Fluorine-expedited nitridation of layered perovskite Sr<sub>2</sub>TiO<sub>4</sub> for visible-light-driven photocatalytic overall water splitting**

Jinxing Yu<sup>1#</sup>, Jie Huang<sup>2,3#</sup>, Ronghua Li<sup>4</sup>, Yanbo Li<sup>4</sup>, Gang Liu<sup>2,3\*</sup>, Xiaoxiang Xu<sup>1\*</sup>

<sup>1</sup>Shanghai Key Lab of Chemical Assessment and Sustainability, School of Chemical Science and Engineering, Tongji University, Shanghai, 200092, China

<sup>2</sup>Shenyang National laboratory for Materials Science, Institute of Metal Research, Chinese Academy of Sciences, 72 Wenhua Road, Shenyang 110016, China,

<sup>3</sup>School of Materials Science and Engineering, University of Science and Technology of China, 72 Wenhua Road, Shenyang 110016, China

<sup>4</sup>Institute of Fundamental and Frontier Sciences, University of Electronic Science and Technology of China, Chengdu, China

# These authors contributed equally to this work.

\* Correspondence: [gangliu@imr.ac.cn](mailto:gangliu@imr.ac.cn), [xxxu@tongji.edu.cn](mailto:xxxu@tongji.edu.cn)

## Supplementary Tables

**Supplementary Table 1.** Space group, refined unit cell parameters and BET surface area of as-prepared samples, standard deviation is included in the parenthesis

| Samples                                         | Space group   | $a$ (Å)   | $c$ (Å)     | $V$ (Å <sup>3</sup> ) | $S_{\text{BET}}$ (m <sup>2</sup> /g) |
|-------------------------------------------------|---------------|-----------|-------------|-----------------------|--------------------------------------|
| Sr <sub>2</sub> TiO <sub>4</sub>                | <i>I4/mmm</i> | 3.8858(1) | 12.5967(3)  | 190.204(8)            | 0.9(1)                               |
| Sr <sub>2</sub> TiO <sub>3</sub> F <sub>2</sub> | <i>P4/nmm</i> | 3.7980(2) | 15.5517(11) | 224.327(32)           | 1.6(2)                               |
| Sr <sub>2</sub> TiO <sub>4</sub> -N             | <i>I4/mmm</i> | 3.8857(1) | 12.5959(3)  | 190.185(7)            | 4.8(1)                               |
| Sr <sub>2</sub> TiO <sub>4</sub> -NF            | <i>I4/mmm</i> | 3.8866(1) | 12.5988(2)  | 190.312(3)            | 4.9(1)                               |

**Supplementary Table 2.** Comparisons of POWS activity over some reported photocatalysts active to visible light

| Photocatalyst                                                | Catalyst dosage (g) | Cocatalyst                                                                | Gas evolution rate (μmol/h)                         | AQE                                 | STH     | Ref.      |
|--------------------------------------------------------------|---------------------|---------------------------------------------------------------------------|-----------------------------------------------------|-------------------------------------|---------|-----------|
| Ta <sub>3</sub> N <sub>5</sub>                               | 0.3                 | 0.02 wt% Rh/0.06 wt% Cr <sub>2</sub> O <sub>3</sub>                       | ~6.4 for H <sub>2</sub> , ~2.6 for O <sub>2</sub>   | 0.22% ( $\lambda = 420 \pm 25$ nm)  | 0.014%  | 1         |
| SrTaO <sub>2</sub> N                                         | 0.15                | 4 wt% CrO <sub>y</sub> /4 wt% Ru/1 wt% IrO <sub>2</sub> (MW)              | -                                                   | 0.34% ( $\lambda = 420 \pm 30$ nm)  | 0.0063% | 2         |
| BaTaO <sub>2</sub> N                                         | 0.2                 | 1 wt% Rh/1 wt% Cr <sub>2</sub> O <sub>3</sub> /0.3 wt% IrO <sub>2</sub>   | ~0.27 for H <sub>2</sub> , ~0.12 for O <sub>2</sub> | 0.08% ( $\lambda = 420 \pm 20$ nm)  | 0.0005% | 3         |
| LaMg <sub>1/3</sub> Ta <sub>2/3</sub> O <sub>2</sub> N       | 0.2                 | 0.5 wt% RhCrO <sub>y</sub>                                                | -                                                   | 0.03% ( $\lambda = 440 \pm 30$ nm)  | -       | 4         |
| Y <sub>2</sub> Ti <sub>2</sub> O <sub>5</sub> S <sub>2</sub> | 0.2                 | 1.5 wt% Cr <sub>2</sub> O <sub>3</sub> /2 wt% Rh/0.3 wt% IrO <sub>2</sub> | ~4.0 for H <sub>2</sub> , ~2.1 for O <sub>2</sub>   | 0.36% ( $\lambda = 420 \pm 13$ nm)  | 0.007%  | 5         |
| PbTiO <sub>3</sub>                                           | 0.1                 | 0.25 wt% Rh/0.25 wt% Cr <sub>2</sub> O <sub>3</sub>                       | ~3.29 for H <sub>2</sub> , ~1.74 for O <sub>2</sub> | 0.027% ( $\lambda = 420 \pm 20$ nm) | -       | 6         |
| BiVO <sub>4</sub>                                            | 0.01                | 2 wt% Rh/2 wt% Cr/0.5 wt% MnO <sub>x</sub>                                | -                                                   | 0.025% ( $\lambda = 420 \pm 20$ nm) | 0.012%  | 7         |
| NiTi <sub>0.99</sub> Ga <sub>0.01</sub> O <sub>3</sub>       | 0.05                | 4 wt% Co/1 wt% Pt                                                         | -                                                   | 0.18% ( $\lambda = 420 \pm 20$ nm)  | -       | 8         |
| BaTaO <sub>2</sub> N:Mg                                      | 0.05                | 6 wt% Rh/6 wt% Cr <sub>2</sub> O <sub>3</sub> /0.3 wt% IrO <sub>2</sub>   | ~0.21 for H <sub>2</sub> , ~0.11 for O <sub>2</sub> | 0.08% ( $\lambda = 420 \pm 20$ nm)  | 0.0004% | 9         |
| TaON:Zr                                                      | 0.15                | 4 wt% Ru/4 wt% Cr/0.6 wt% IrO <sub>2</sub>                                | ~3.0 for H <sub>2</sub> , ~1.4 for O <sub>2</sub>   | 0.66% ( $\lambda = 420 \pm 20$ nm)  | 0.009%  | 10        |
| F/N co-doped Sr <sub>2</sub> TiO <sub>4</sub>                | 0.4                 | 0.5 wt% RhCrO <sub>y</sub>                                                | ~12.1 for H <sub>2</sub> , ~6.1 for O <sub>2</sub>  | 0.39% ( $\lambda = 420 \pm 20$ nm)  | 0.028%  | This work |

## Supplementary Figures

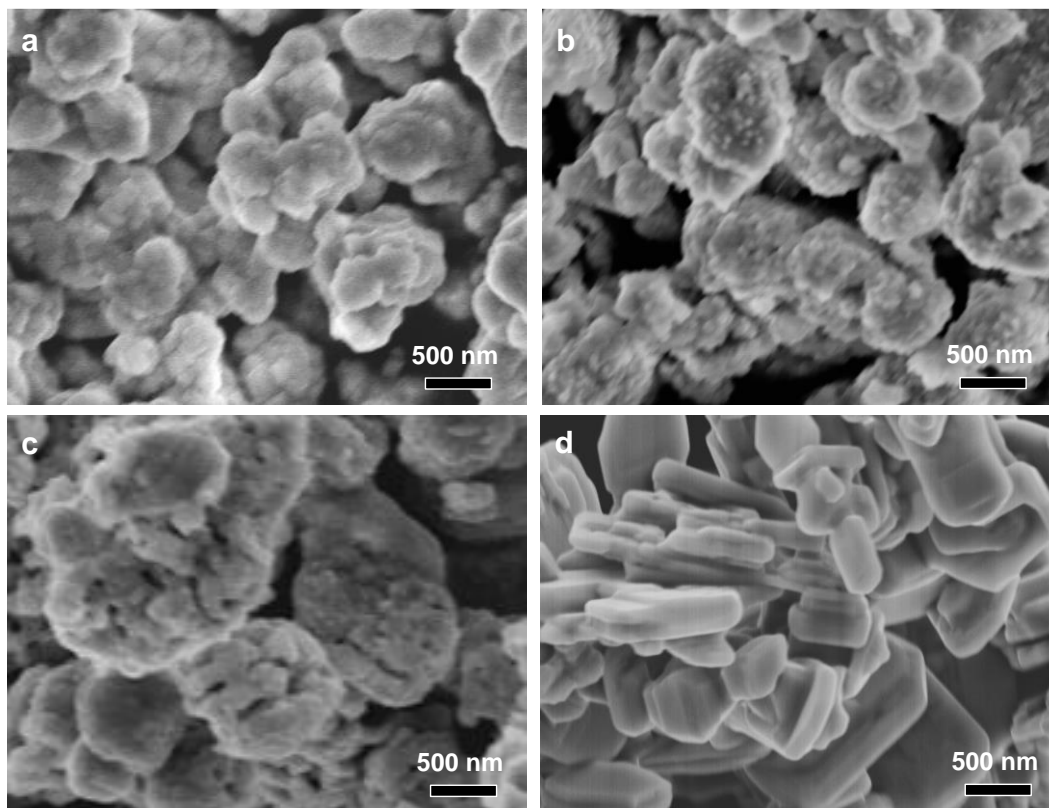

**Supplementary Fig. 1** FE-SEM images of the precursor powders: **a**  $\text{Sr}_2\text{TiO}_4$ . **b**  $\text{Sr}_2\text{TiO}_3\text{F}_2$ . **c**  $\text{Sr}_2\text{TiO}_4\text{-N}$ . **d**  $\text{Sr}_2\text{TiO}_4\text{-NF}$ .

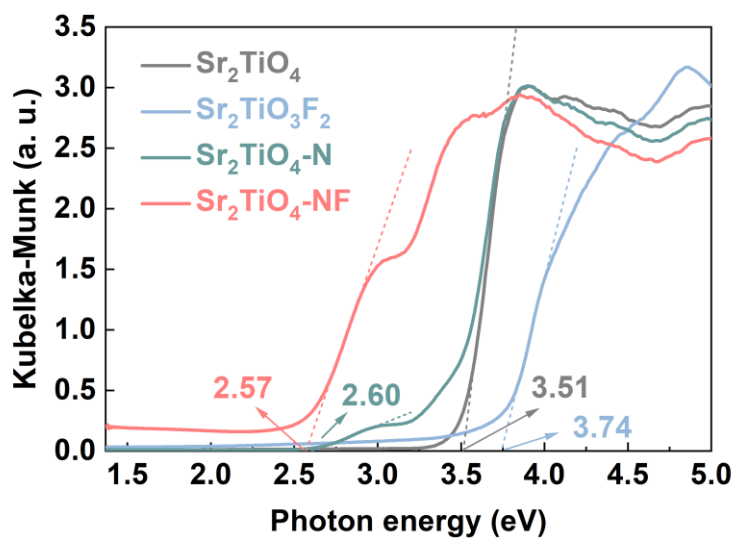

**Supplementary Fig. 2** Bandgap determination from UV-Vis DRS spectra of  $\text{Sr}_2\text{TiO}_4$ ,  $\text{Sr}_2\text{TiO}_3\text{F}_2$ ,  $\text{Sr}_2\text{TiO}_4\text{-N}$  and  $\text{Sr}_2\text{TiO}_4\text{-NF}$

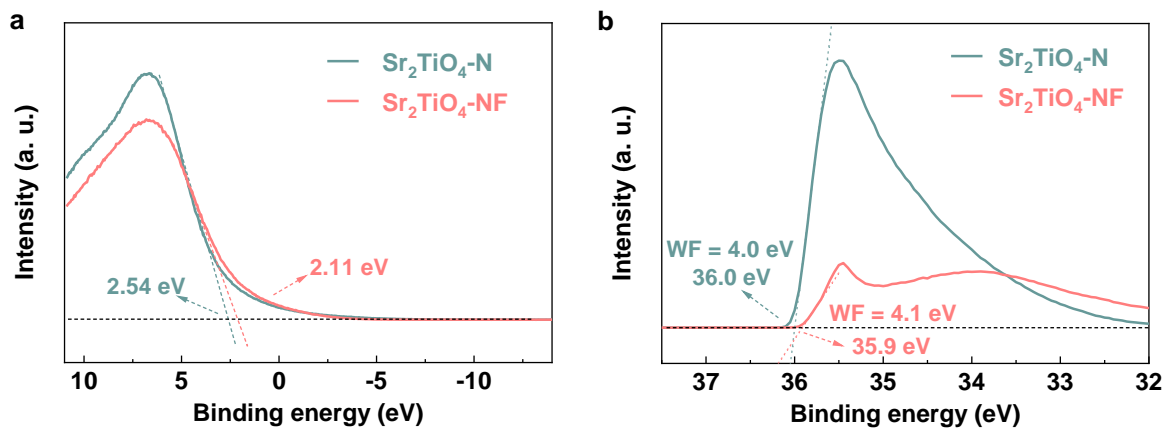

**Supplementary Fig. 3** **a** UPS valence band spectra of  $\text{Sr}_2\text{TiO}_4\text{-N}$  and  $\text{Sr}_2\text{TiO}_4\text{-NF}$ . **b** UPS secondary electron cutoff spectra of  $\text{Sr}_2\text{TiO}_4\text{-N}$  and  $\text{Sr}_2\text{TiO}_4\text{-NF}$ , work function (WF) is deduced based on the energy difference between incident photons (40 eV) and the cutoff energy.

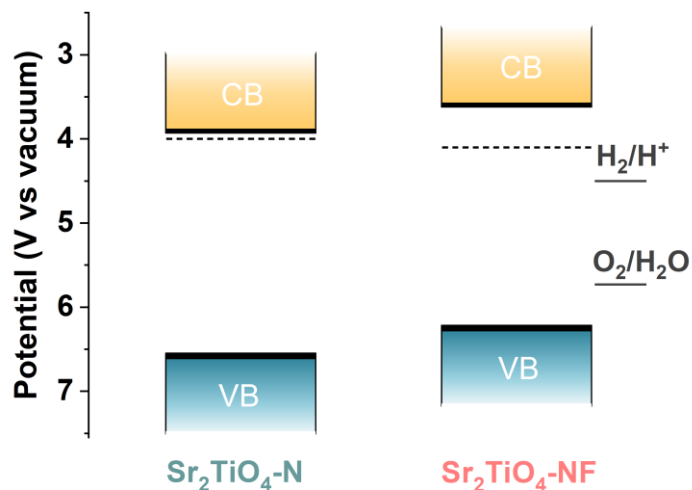

**Supplementary Fig. 4** Schematic illustration of UPS-deduced band edge positions of  $\text{Sr}_2\text{TiO}_4\text{-N}$  and  $\text{Sr}_2\text{TiO}_4\text{-NF}$ , fermi level is denoted by dashed lines and the potential scale is defined by referring to the vacuum level at 0.0 V.

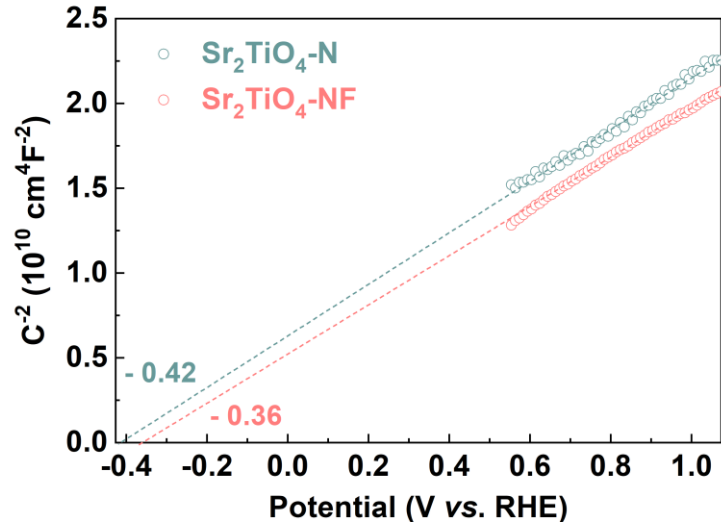

**Supplementary Fig. 5** Mott-Schottky (MS) plot of  $\text{Sr}_2\text{TiO}_4\text{-N}$  and  $\text{Sr}_2\text{TiO}_4\text{-NF}$ , flat-band potential is determined by extrapolating the MS curves down to energy axis.

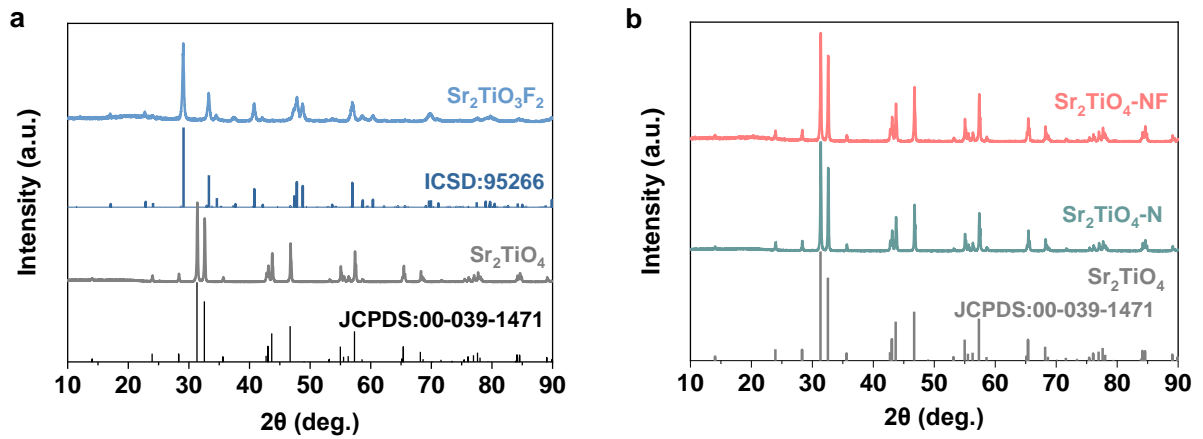

**Supplementary Fig. 6** **a** XRD patterns of  $\text{Sr}_2\text{TiO}_3\text{F}_2$  and  $\text{Sr}_2\text{TiO}_4$  precursors. **b** XRD patterns of  $\text{Sr}_2\text{TiO}_4\text{-N}$  and  $\text{Sr}_2\text{TiO}_4\text{-NF}$ .

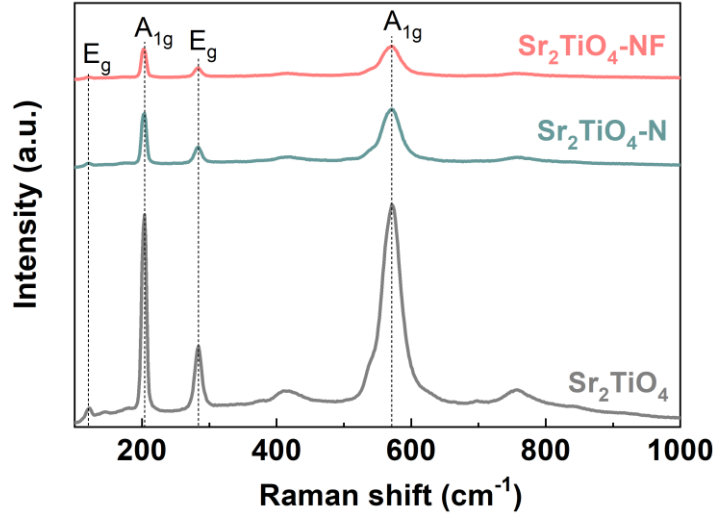

**Supplementary Fig.7** Raman spectra of  $\text{Sr}_2\text{TiO}_4\text{-NF}$  and  $\text{Sr}_2\text{TiO}_4\text{-N}$ , the main Raman active modes ( $A_{1g}$  and  $E_g$ ) for  $\text{Sr}_2\text{TiO}_4$  are maintained in both samples.

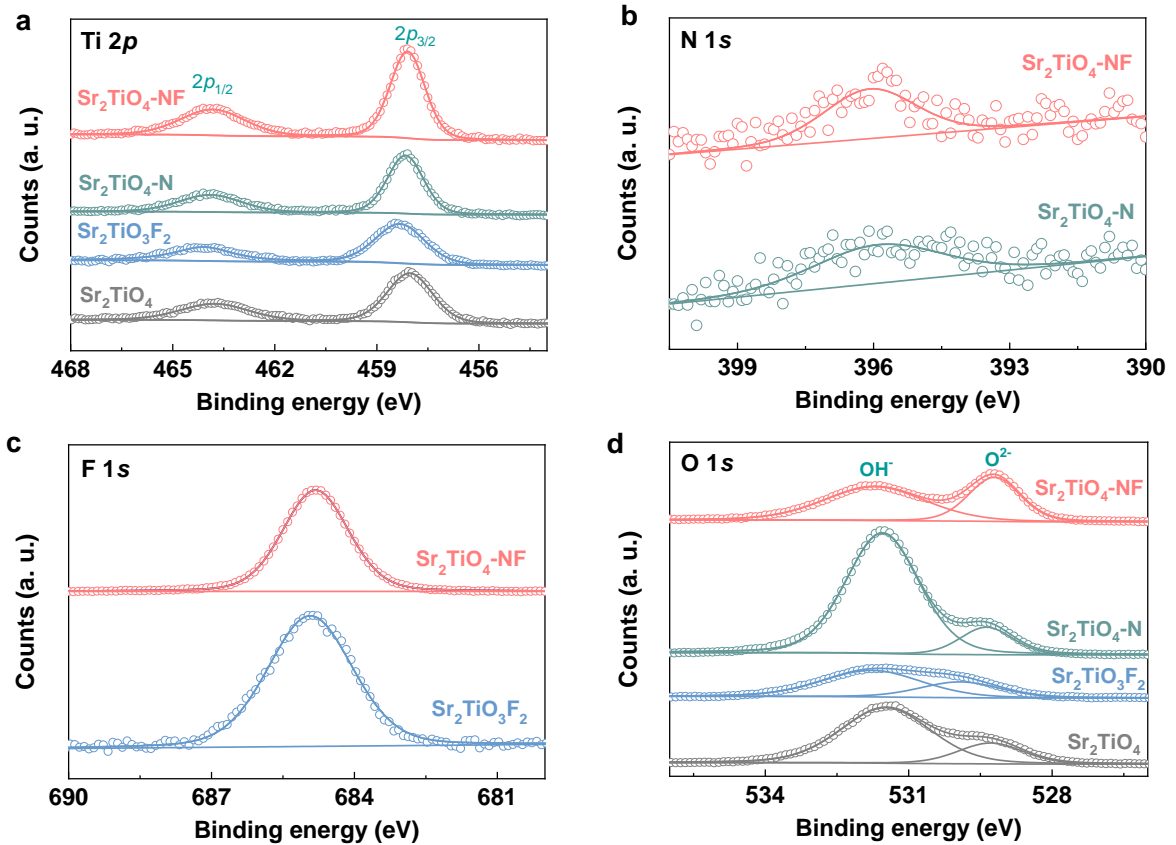

**Supplementary Fig. 8** XPS spectra of  $\text{Sr}_2\text{TiO}_4$ ,  $\text{Sr}_2\text{TiO}_3\text{F}_2$ ,  $\text{Sr}_2\text{TiO}_4\text{-N}$  and  $\text{Sr}_2\text{TiO}_4\text{-NF}$ : **a** Ti 2p, **b** N 1s, **c** F 1s, **d** O 1s.

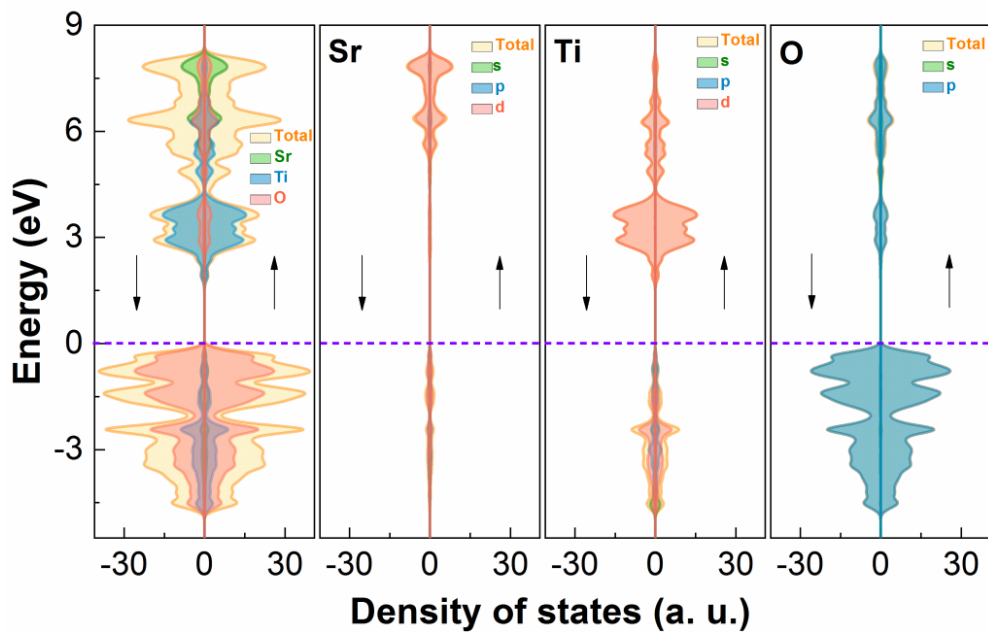

**Supplementary Fig.9** Band structure, density of states (DOS) and projected density of states (PDOS) of  $\text{Sr}_2\text{TiO}_4$ , Fermi level is denoted by the dashed purple lines.

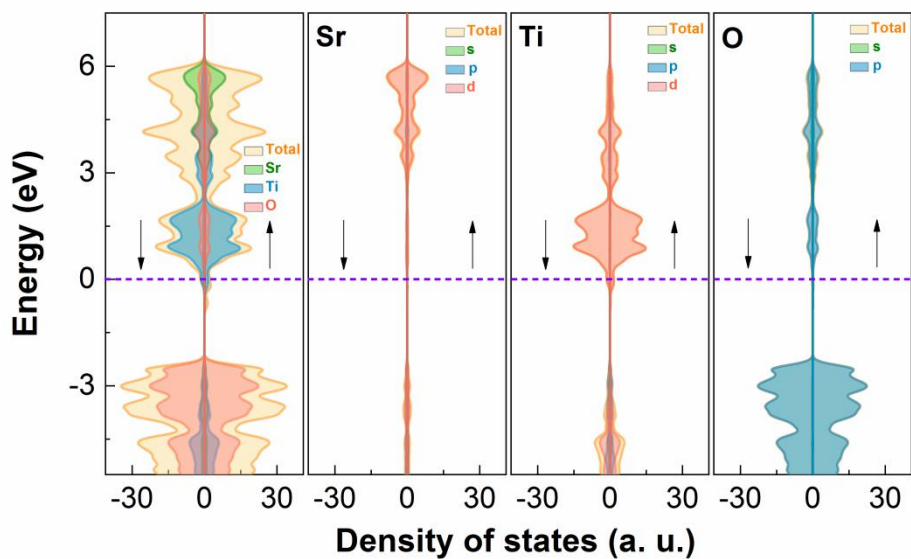

**Supplementary Fig. 10** Band structure, density of states (DOS) and projected density of states (PDOS) of  $\text{Sr}_2\text{TiO}_4$  containing  $\text{Ti}^{3+}$  and  $\text{V}_\text{O}$  defects, Fermi level is denoted by the dashed purple lines.

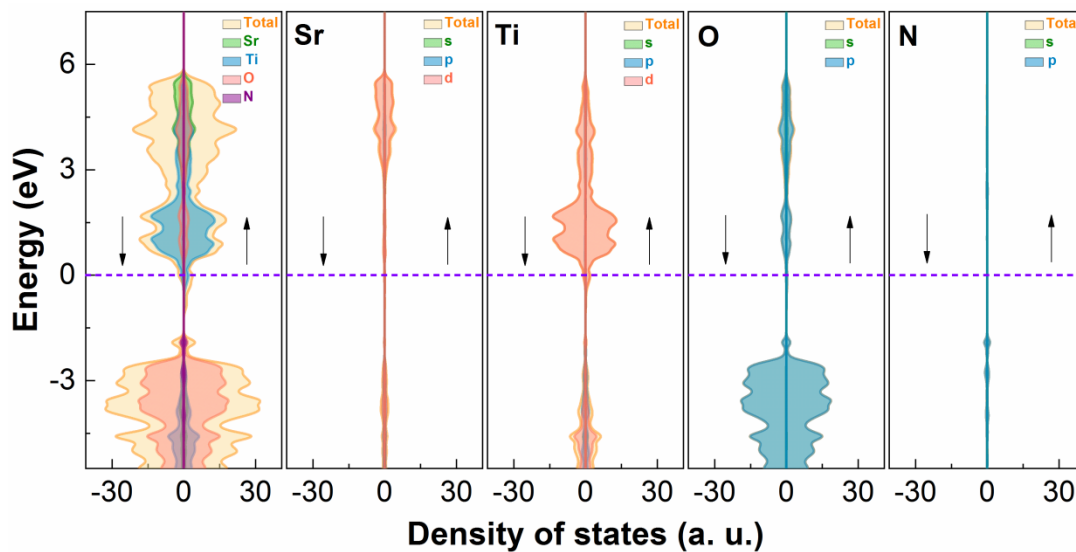

**Supplementary Fig. 11** Band structure, density of states (DOS) and projected density of states (PDOS) of  $\text{Sr}_2\text{TiO}_4$  containing  $\text{Ti}^{3+}$ ,  $\text{V}_\text{O}$  and  $\text{N}_\text{O}$  defects, Fermi level is denoted by the dashed purple lines.

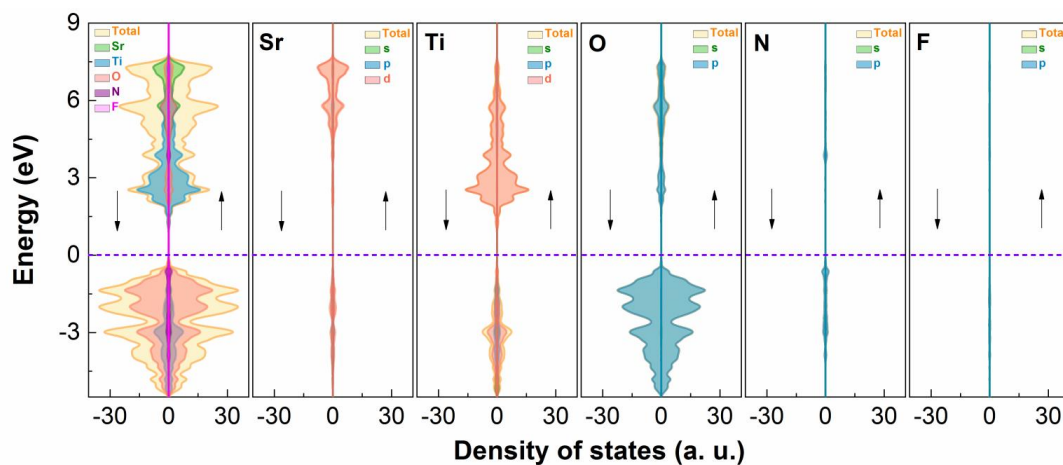

**Supplementary Fig. 12** Band structure, density of states (DOS) and projected density of states (PDOS) of  $\text{Sr}_2\text{TiO}_4$  containing  $\text{F}_\text{O}$  and  $\text{N}_\text{O}$  defects, Fermi level is denoted by the dashed purple lines.



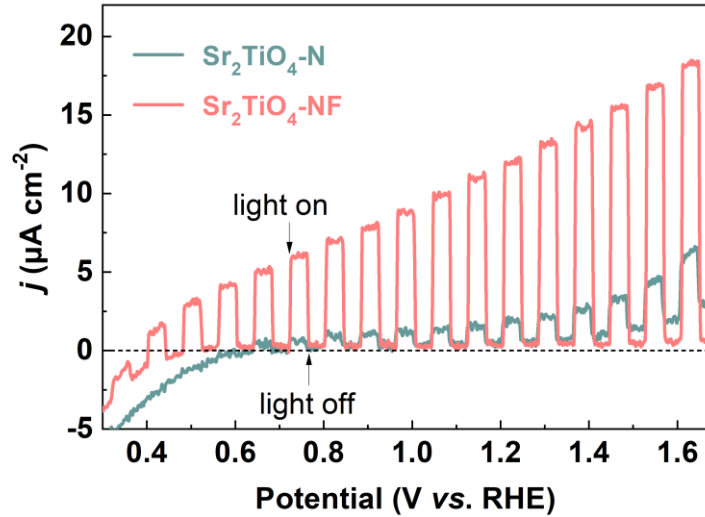

**Supplementary Fig. 13** Linear scan voltammetry (LSV) curves of photoelectrodes fabricated by  $\text{Sr}_2\text{TiO}_4\text{-N}$  and  $\text{Sr}_2\text{TiO}_4\text{-NF}$  powders under chopped visible light illumination ( $\lambda \geq 420$  nm). The potential is not iR corrected. The area of the photoelectrode is  $1 \text{ cm}^2$ .

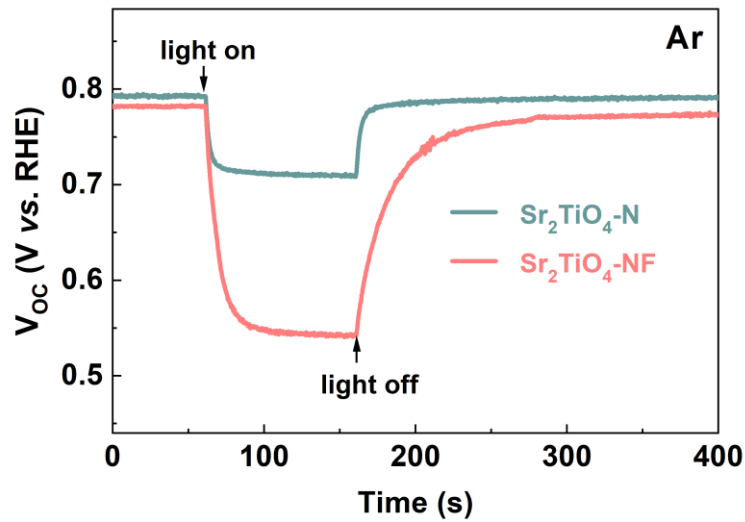

**Supplementary Fig. 14** Open-circuit voltage ( $V_{oc}$ ) decay profiles of  $\text{Sr}_2\text{TiO}_4\text{-N}$  and  $\text{Sr}_2\text{TiO}_4\text{-NF}$  in Ar. The potential is not iR corrected.

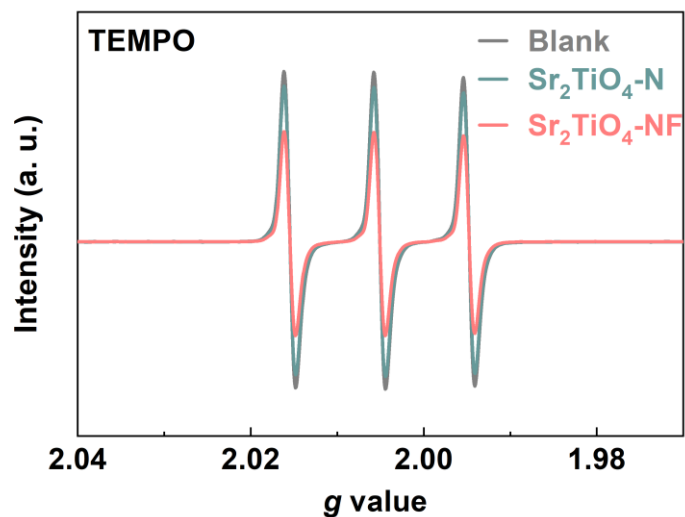

**Supplementary Fig. 15** EPR spectra of TEMPO in the presence and absence of light-illuminated Sr<sub>2</sub>TiO<sub>4</sub>-N and Sr<sub>2</sub>TiO<sub>4</sub>-NF for 8 s

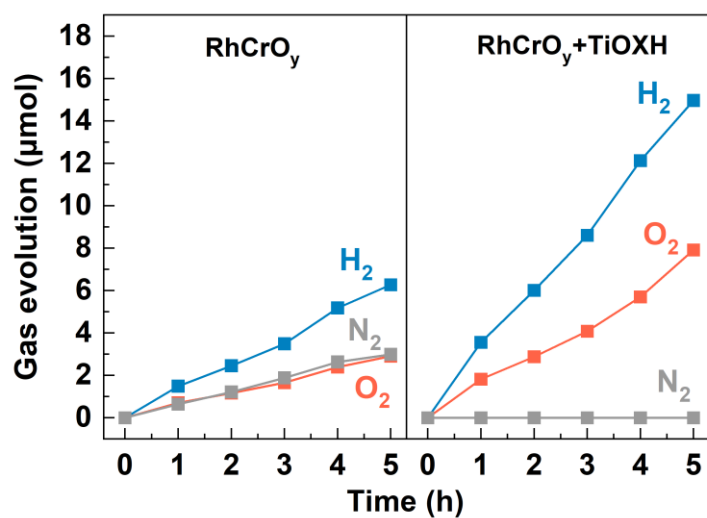

**Supplementary Fig. 16** Temporal gas evolution (H<sub>2</sub>, O<sub>2</sub> and N<sub>2</sub>) over Sr<sub>2</sub>TiO<sub>4</sub>-NF coated with or without TiOXH (1 wt%) under visible light illumination ( $\lambda \geq 420$  nm). RhCrO<sub>y</sub> (0.5 wt%) was loaded as a cocatalyst.

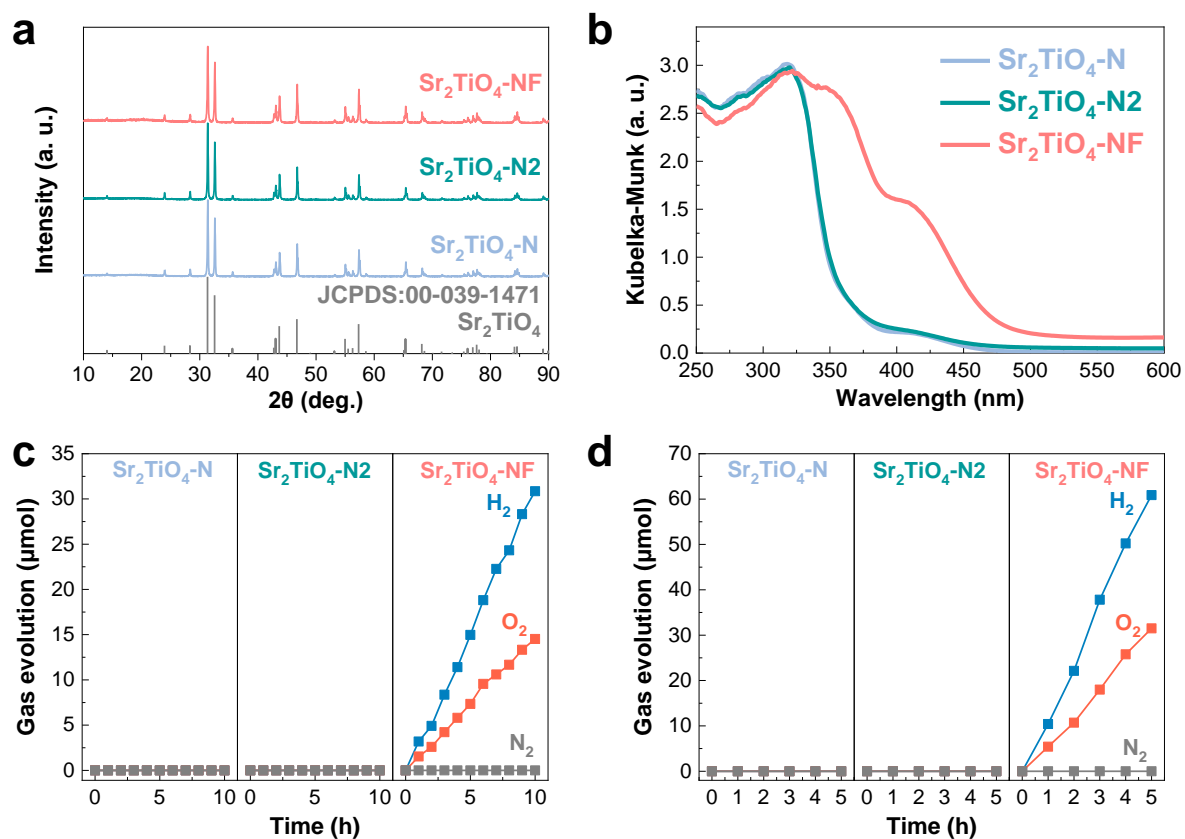

**Supplementary Fig. 17** **a** XRD patterns of Sr<sub>2</sub>TiO<sub>4</sub>-N, Sr<sub>2</sub>TiO<sub>4</sub>-N<sub>2</sub>, and Sr<sub>2</sub>TiO<sub>4</sub>-NF, standard patterns of Sr<sub>2</sub>TiO<sub>4</sub> are also included for comparisons; **b** UV-vis DRS spectra of Sr<sub>2</sub>TiO<sub>4</sub>-N, Sr<sub>2</sub>TiO<sub>4</sub>-N<sub>2</sub>, and Sr<sub>2</sub>TiO<sub>4</sub>-NF; **c** photocatalytic overall water splitting for Sr<sub>2</sub>TiO<sub>4</sub>-N, Sr<sub>2</sub>TiO<sub>4</sub>-N<sub>2</sub>, and Sr<sub>2</sub>TiO<sub>4</sub>-NF under visible light (λ ≥ 420 nm); **d** photocatalytic overall water splitting for Sr<sub>2</sub>TiO<sub>4</sub>-N, Sr<sub>2</sub>TiO<sub>4</sub>-N<sub>2</sub>, and Sr<sub>2</sub>TiO<sub>4</sub>-NF under simulated sunlight (100 mW·cm<sup>-2</sup>). Reaction conditions: 0.4 g catalysts, RhCrO<sub>y</sub> (0.5 wt%) cocatalyst, 100 mL deionized water.

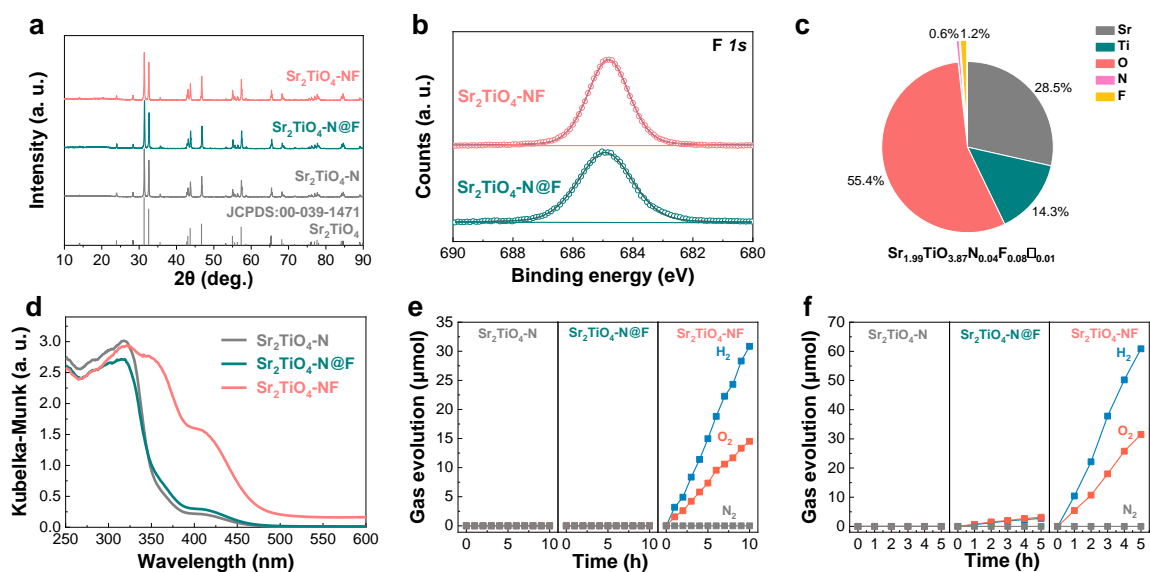

**Supplementary Fig. 18** **a** XRD patterns of  $\text{Sr}_2\text{TiO}_4\text{-N}$ ,  $\text{Sr}_2\text{TiO}_4\text{-N@F}$ , and  $\text{Sr}_2\text{TiO}_4\text{-NF}$ , standard patterns of  $\text{Sr}_2\text{TiO}_4$  are also included for comparisons; **b** XPS F 1s spectra of  $\text{Sr}_2\text{TiO}_4\text{-N@F}$  and  $\text{Sr}_2\text{TiO}_4\text{-NF}$ ; **c** element content of  $\text{Sr}_2\text{TiO}_4\text{-N@F}$  by ICP, ONH and ion chromatograph analysis, deduced chemical formula are shown at the bottom (oxygen vacancies are represented by empty squares ' $\square$ '); **d** UV-vis DRS spectra of  $\text{Sr}_2\text{TiO}_4\text{-N}$ ,  $\text{Sr}_2\text{TiO}_4\text{-N@F}$ , and  $\text{Sr}_2\text{TiO}_4\text{-NF}$ ; **e** photocatalytic overall water splitting for  $\text{Sr}_2\text{TiO}_4\text{-N}$ ,  $\text{Sr}_2\text{TiO}_4\text{-N@F}$ , and  $\text{Sr}_2\text{TiO}_4\text{-NF}$  under visible light ( $\lambda \geq 420$  nm); **f** photocatalytic overall water splitting for  $\text{Sr}_2\text{TiO}_4\text{-N}$ ,  $\text{Sr}_2\text{TiO}_4\text{-N@F}$ , and  $\text{Sr}_2\text{TiO}_4\text{-NF}$  under simulated sunlight ( $100 \text{ mW}\cdot\text{cm}^{-2}$ ). Reaction conditions: 0.4 g catalysts,  $\text{RhCrO}_y$  (0.5 wt%) cocatalyst, 100 mL deionized water.

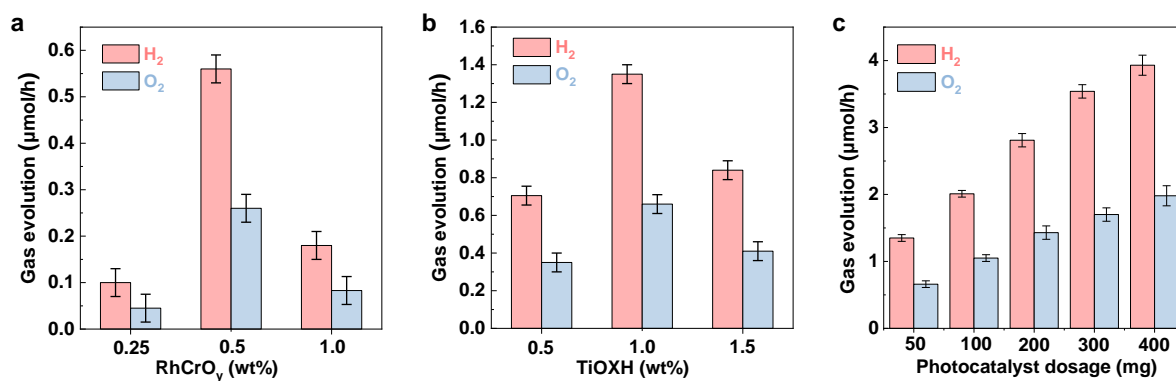

**Supplementary Fig. 19** POWS activity over Sr<sub>2</sub>TiO<sub>4</sub>-NF as a function of: **a** RhCrO<sub>y</sub> content, TiOXH content is fixed at 1 wt%, catalyst dosage is fixed at 50 mg; **b** TiOXH content, RhCrO<sub>y</sub> content is fixed at 0.5 wt%, catalyst dosage is fixed at 50 mg; **c** catalyst dosage, RhCrO<sub>y</sub> content is fixed at 0.5 wt%, TiOXH content is fixed at 1 wt%. The error bars correspond to the standard deviations of the measurements repeated for three times.

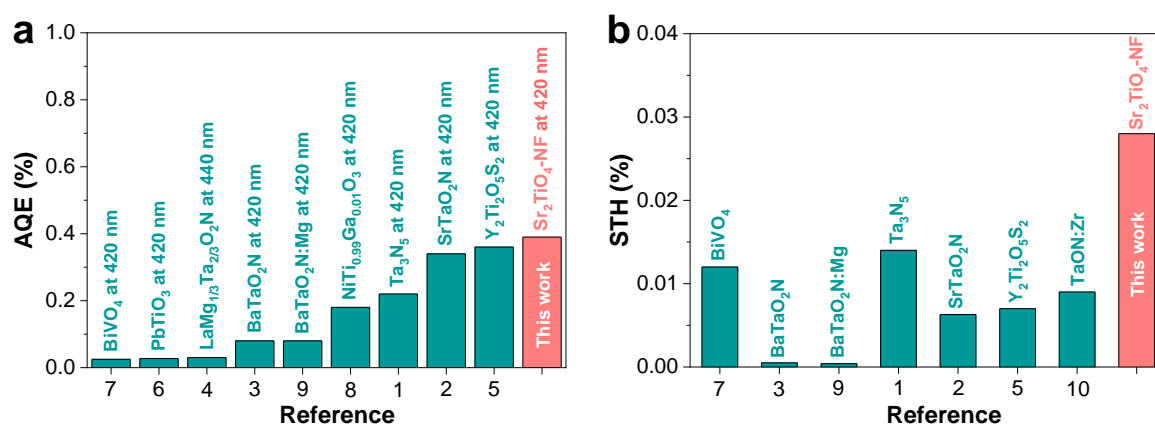

**Supplementary Fig. 20** (a) Comparisons of visible-light-active compounds reported for POWS: (a) AQE of POWS under visible light; (b) STH of POWS. More detailed information can be found in **Supplementary Table 2**.

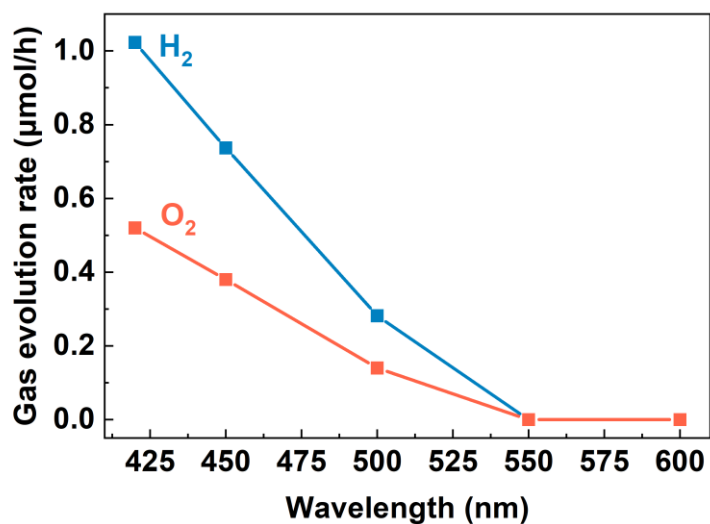

**Supplementary Fig. 21** Gas evolution rate as a function of wavelength over Sr<sub>2</sub>TiO<sub>4</sub>-NF.

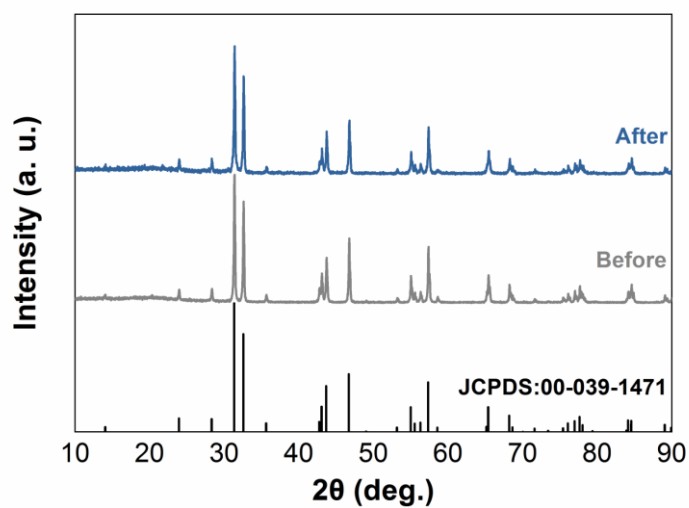

**Supplementary Fig. 22** XRD patterns of Sr<sub>2</sub>TiO<sub>4</sub>-NF before and after photocatalytic overall water splitting reactions, standard patterns of Sr<sub>2</sub>TiO<sub>4</sub> are also included for comparisons.

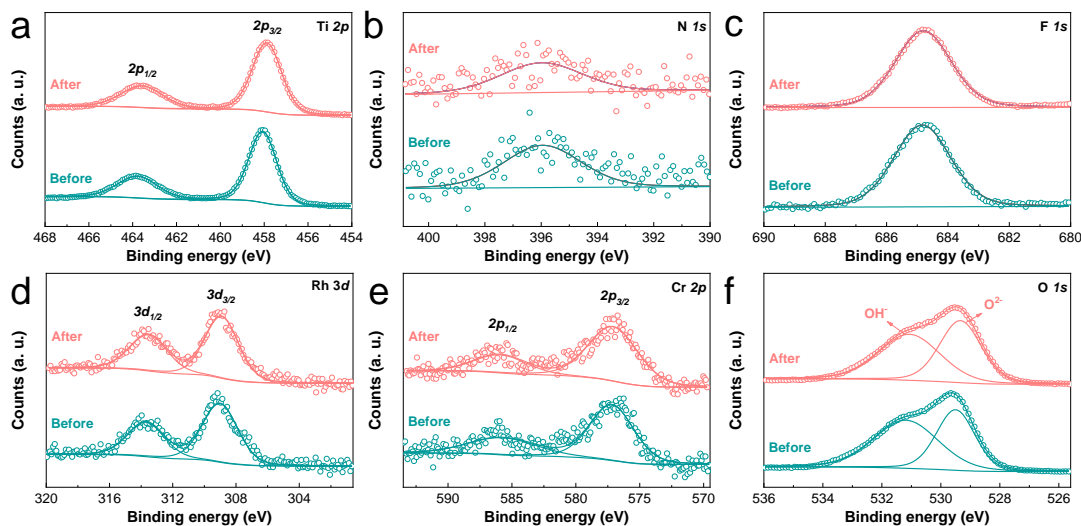

**Supplementary Fig. 23** XPS of  $\text{Sr}_2\text{TiO}_4\text{-NF}$  before and after photocatalytic overall water splitting reactions: **a** Ti 2p; **b** N 1s; **c** F 1s; **d** Rh 3d; **e** Cr 2p; **f** O 1s.

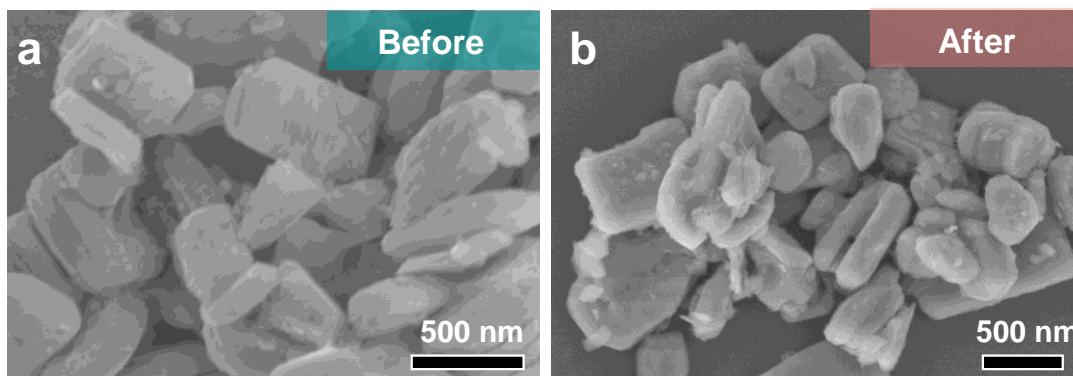

**Supplementary Fig. 24** SEM image of  $\text{Sr}_2\text{TiO}_4\text{-NF}$  before and after photocatalytic overall water splitting reactions: **a** before; **b** after.

## Supplementary References

1. Wang Z., *et al.* Overall water splitting by  $\text{Ta}_3\text{N}_5$  nanorod single crystals grown on the edges of  $\text{KTaO}_3$  particles. *Nat. Catal.* **1**, 756-763 (2018).
2. Chen K. H., *et al.* Overall Water Splitting by a  $\text{SrTaO}_2\text{N}$ -Based Photocatalyst Decorated with an Ir-Promoted Ru-Based Cocatalyst. *J. Am. Chem. Soc.* **145**, 3839-3843 (2023).
3. Nishimae S., *et al.* Active  $\text{BaTaO}_2\text{N}$  photocatalysts prepared from an amorphous  $\text{Ta}_2\text{O}_5$  precursor for overall water splitting under visible light. *J. Mater. Chem. A* **11**, 6299-6310 (2023).
4. Pan C. S., *et al.* A Complex Perovskite-Type Oxynitride: The First Photocatalyst for Water Splitting

- Operable at up to 600 nm. *Angew. Chem. Int. Ed.* **54**, 2955-2959 (2015).
5. Wang Q., *et al.* Oxysulfide photocatalyst for visible-light-driven overall water splitting. *Nat. Mater.* **18**, 827-832 (2019).
  6. Wan G. D., *et al.* Photocatalytic Overall Water Splitting over PbTiO<sub>3</sub> Modulated by Oxygen Vacancy and Ferroelectric Polarization. *J. Am. Chem. Soc.* **144**, 20342-20350 (2022).
  7. Dai D. J., *et al.* Strain Adjustment Realizes the Photocatalytic Overall Water Splitting on Tetragonal Zircon BiVO<sub>4</sub>. *Adv. Sci.* **9**, 2105299 (2022).
  8. Wang L., Kong Y. H., Fang Y. X., Cai P. R., Lin W., Wang X. C. A Ga Doped NiTiO<sub>3</sub> Photocatalyst for Overall Water Splitting under Visible Light Illumination. *Adv. Funct. Mater.* **32**, 2208101 (2022).
  9. Li H. H., *et al.* One-Step Excitation Overall Water Splitting over a Modified Mg-Doped BaTaO<sub>2</sub>N Photocatalyst. *ACS Catal.* **12**, 10179-10185 (2022).
  10. Xiao J. D., *et al.* Enhanced Overall Water Splitting by a Zirconium-Doped TaON-Based Photocatalyst. *Angew. Chem. Int. Ed.* **61**, e202116573 (2022).
