# Supplementary material for: Fluorine-expedited nitridation of layered perovskite Sr2TiO4 for visible-light-driven photocatalytic overall water splitting
Source: PubMed Central journal article supplement — Nat Commun. 2025 Jan 3;16:361. doi: 10.1038/s41467-024-55748-z (PMC11699056; doi:10.1038/s41467-024-55748-z), 2025-01-03
Supplement: 41467_2024_55748_MOESM2_ESM.pdf [file 41467_2024_55748_MOESM2_ESM.pdf]

## Description of Additional Supplementary Files

**Supplementary Data 1:** The atomic coordinates of the optimized unit cells for the DFT calculation of pristine  $\text{Sr}_2\text{TiO}_4$ ,  $\text{Sr}_2\text{TiO}_4$  containing  $\text{Ti}^{3+}$  and  $\text{V}_\text{O}$  defects,  $\text{Sr}_2\text{TiO}_4$  containing  $\text{Ti}^{3+}$ ,  $\text{V}_\text{O}$  and  $\text{N}_\text{O}$  defects, and  $\text{Sr}_2\text{TiO}_4$  containing  $\text{F}_\text{O}$  and  $\text{N}_\text{O}$  defects.
